# Supplementary material for: Identification and expression analysis of the WRKY gene family during different developmental stages in Lycium ruthenicum Murr. fruit
Source: PeerJ. 2020 Oct 28;8:e10207. doi: 10.7717/peerj.10207 (PMC7602686; doi:10.7717/peerj.10207)
Supplement: Supplemental Information 1 [file peerj-08-10207-s001.xlsx]

## Sheet: Sheet1
Supplementary Data 1: Amino acid sequence of the predicted 73 LrWRKY proteins.
>LrWRKY1
MDNSSKIGSQEKMETIDLSLKLNHEETLHNSSRDLSQVDSKIQRKEEKLGENMKREKFSVLQEEMNLMKEENKVLRKAVDQTMKDYDDLQMKFAITQQNIDKKGPKDFLSLNGNSYARSPRNFDMNKRTPSAESQEEDGELGLSLTLLSSGSSNTSKVEAEEQKKDATTTIFSPIETNLTSHVNSTPNRKARVSVRAICGAATMNDGCQWRKYGQKIAKGNPCPRAY
>LrWRKY2
LSHMDNSSKIGSQEKMETIDLSLKLNHEETLHNSSRDLSQVDSKIQRKEEKLGENMKREKFSVLQEEMNLMKEENKVLRKAVDQTMKDYDDLQMKFAITQQNIDKKGPKDFLSLNGNSYARSPRNFDMNKRTPSAESQEEDGELGLSLTLLSSGSSNTSKVEAEEQKKDATTTIFSPIETNLTSHVNSTPNRKARVSVRAICGAATMNDGCQWRKYGQKIAKGNPCPRAY
>LrWRKY3
IFRRSKVKKKGQKRIRQPRFAFMTKSEVVDHLEDGYRWRKYGQKAVKNSPYPRSYYRCTNTKCTVKKRVERSSEDSSIVITTYEGQHCHHTVGFPRGGLINHEAAFTSQLAPLASQFYHPPGVQYPHQELVPMNAASGSRTMPGETGDQARKLPEASQPAATQLPTDDGLLGDIVPPGMRSR
>LrWRKY4
LLSSPSSQNRKNSSGSSMEDSHSHSQQQQHSQLTDGRISTVGFSHNTGGSNGGGSAKYKLMTPAMLPISRSTCITIPPGLSPSSFLESPVLLSNIKAEPSPTTGSFSKYQTVQCFGGAAPFLLTGGYSTGNTYIERKSSCFEFKYAGGPSSTSGSLATEHVISAGLNQQQNEPLKEVQDQSHPELLAPSSLAKHEMATSTELSISSPINVDASSKEESLSAPINVDAMNPRGQSNSMQGSHADHKELSAVIPERSSDDGYNWRKYGQKLVKGSEFPRSYYKCTYPNCEVKKIFERSPDGHITEIVYKGSHDHPKPQPSRRFTPGALTSILEDRGEREPCLTGQEGKLNCSLRVVSPSKNA
>LrWRKY5
QEKPQSRMGEKLKAPSISTSSLSTLTIPSRSPFESYFNSGNMPFFSPGPMTLVSSFFSDSEYPSFSQLLAGPMASPLAKPQTLLPEDEEEKSLGHKQNRTMSLMVGQSTPFFTGFSPSRLLNSPGFLSPLQSPFGMSHQQALAHVTAQAAFSQSYLQTQAECHFSSQGTPAQVLGTSDPKESSLQPQLDTTPSDQQIKKVELPQVSQSDDKPVDTPASDGYNWRKYGQKMVKASECPRSYYKCTHLKCPVKKKVERSIDGHITEITYKGHHNHELPEPNKRRRDSCAQDSLDCPKVNAEIEAHTEIEINGLNGALLVHSEQMSTEMASERPVPNECDKIEDTATATGKGHDDEPNVKRMKTTVETPILSSSSKAVSESKIVVQTRSEVDILDDGFKWRK…
>LrWRKY6
QLMENQSMVFLGSTNSYNSMNGWISGLKTEPMAREIDVSSNIKSSSQMGVESSENNNTSNYLSSPLKKKGDKKIKKPRFAFQTRSQVDILDDGYRWRKYGQKAVKNNNYPRSYYRCTQEGCNVKKQVQRLSKDEGVVVTTYEGMHTHPIDKPSDNFEQILHQMHIFPNPPL
>LrWRKY7
LILADRPKMEKPFIDPLFFLCKMIQGQQAWNYQEPKKQDGHSSDQNANGRSEFNTMQSFMQNNDQTNSGNQYNQSTIREQKRSDDGYNWRKYGQKQVKGSENPRSYYKCTYPNCPTKKKVERSLDGQITEIVYKGNHNHPKPQSTRRSSSSTASCAIQSYNTQTNEIPDHQSYGSNGTGQIDSVATPENSSISFGDDEHTSQKSRSRGDDLDEEEPDSKRWKRESESEGLSALGGSRTVREPRVVVQTTSDIDILDDGYRWRKYGQKVVKGNPNPRSYYKCTSPGCPVRKHVERASQDIRSVITTYEGKHNHDVPAARGSGNHSINRPSITNNNSAMTIRPSVTSHQSNYQVPLQSIRPQQLGMQAPFTLEMLQKPNNYGFSGYANSEDSYENQVQASN…
>LrWRKY8
EVDILDDGYKWRKYGQKVVRGNPNPRSYYKCTNAGCPVRKHVERASHDPNAVITTYEGKHNHDVPTARNNNHEMAGSTSVTGGSRIRAVETNSLSLDLGVGTGYRLENGNTGQLHALHSQVQSSRSGTMLVHSGMSRFGAIDNHFQGPSFETLPLQPSTQCHQNYGKILLGP
>LrWRKY9
RCFTHIIKMESQWPENSLAYMKMLINELNCGQELTNRLKEVINKPLCDRGKNLLAEDLVEKLMGSFCKTISILKSSKSIDEDSQVNPMVAASSCRKGGRRLSDEDSTGSCKISSPKDQRGYNKRRKISVKNVKETSTLVDDGHVWRKYGQKQILDAPFPRSYYRCTYKFDQGCQATKQEQRIQANPPRFRTMYQGHHTCTTNYPTVSQILLDSQKDHDDSSTLLSFDSNTNYDYNPCFPTFPSTKKEIKKEVSLTCSYPNQHQIQSSSSDYFLPLEYDYSTLTAETSGHVKVALSSESDNGDFISYGSIYSSSTSTDQYCMEMDMMLGSIDFEHLPFQF
>LrWRKY10
ASPQIPFPLSSQKSAPSFVFFSSPLLLTRKKSIPLQKRETKNMEEDWDLHAVVRGCSASSTSSAATSTTTTTTTSCCSFQPRQDDNIFSFQDPFVPRFDNPTSDFEELHNLYKPFFPKSQQPQQILVPLSPQNNIPISPLSVLGGLQDLSPQQTLKQQQQQHIPQMNSIRLTQPKQSLSINGSPTSASHTQSPRPKRRKNQLKKVCQVPAEGLSSDMWSWRKYGQKPIKGSPYPRGYYRCSTSKGCLARKQVERNRSDPNMFIVTYTAEHNHPMPTHRNSLAGSTRHKPANSEAGTVNDSNKPTTSSPVSSPVTEKQESSRDEKADIFDDDDDDEFGSSNMGLDNNMEPADDDFFEGLDELAAQATGDCFSDNFPVSMQLPWLSNNATTTAAGGV
>LrWRKY11
ECPRSYYKCTHLKCQVKKKVERSVDGHITEITYNGQHNHQPTKQRKDVSALDSTECSKVPTQMAAELLVKTECDETEINLIEVDEGHDEPDAKRTKMEVETLASSHGTVAESKIVLQTRSEVDFLDDGYKWRKYGQKLVKGSQHPRSYYRCTYGGCNVRKQVERASTDPKAVITTYEGKHNHDIPTGIRNRGTRNKCS
>LrWRKY12
FHHHKKNKQLKKKKKKLFKRSSTKVWNKTKGRMERGEERELNNYNLQVSANNIHELGFVHFADHNQVMSFLAPSSQSSQISQSLQASLMPTTTTNVTASSNNISSALGFNHNELVHRPSWNNDQVETLDPKAVNDSGNASEGNNSWWKGSSSDKGKVKIRRKLREPRFCFQTRSDIDVLDDGYKWRKYGQKVVKNSLHPRSYYRCTHSNCRVKKRVERLSEDCRMVITTYEGRHNHSPCDDS
>LrWRKY13
MYATRIQSITMADHSPSANMFDGSSRSLDSPDSDFSNHLVNFELSDILEIDNWPVQEDPTLFVSQYSNYAANQVVTTRSYHEEPSNNIGSSSERKEVKDKVAFRTLSQIEILDDGYKWRKYGKKMVKNSPNPRNYYRCSVEGCPVKKRVERDKEDSRYVITTYEGVHNHSDSCNRAGV
>LrWRKY14
CLHHWVEISSILGIRGPFFCFFFELGEMEEIEEANRVAVESCHRVINLVSQKPHHDQKQFGSNLVRETGEAVRKFKKVVTLLNSNLGHARVRKSKKIMTPNFPHSLLLEKNPSCKTDDQPKPLQLLPVLEIGSNVKSTLTLGNPSLELSSHSKNSNPHPLHSAQQQTHLSSYHFVQQQKLYQLQQQQMKQQQADMMYRRSGNSGISLNFDSSTCTPTMSSTRSFISSLSIDRSVTNLDGSNGFHFIGASSRSADQSSFQHKKRCSGRGEEGSVKCGSSGRCHCSKKRKHRVKRSIKVPAISNKLADIPPDEYSWRKYGQKPIKGSPHPRGYYKCSSMRGCPARKHVERCLEEPSMLIVTYEGEHNHPRLPSQSANA
>LrWRKY15
VLSYLPYIIINFCIYICTNTNFIRTKSDKEKELDIAMDGRFNNFFVSEHEDSENSPENSSDSPRSGMFNDSKLMTSTSSPKRSRRSIEKRVVSVPIKEVEGSKMKGEISMPPSDSWAWRKYGQKPIKGSPYPRGYYRCSSSKGCPARKQVERSRADPSMLVVTYSCEHNHPWPASRNNQHNHRTTTTPTCTNNNAKTKMKTIASLTASPAATTTTT
>LrWRKY16
FVLGVAHAKQCRQLMGGFDDHVAIMGDWMPPSPSPRTFFSSLLGDDVGSRSTFEGARNLASGTQEHVENSDGNDGAQAGATSEQMVKLSAISDQKMSSSRGGLLERLAARAGFNAPKLNTESLRPADLSHNQGVRSPCLTIPPGLSPTSLLESPVFLSNSLVQPSPTTGKFPFSSGFESRNSGLMMEDPDKRKENALESINSLSFSFKPVPETAPSLFPGTTSRSWLQVNPSNFSQQGFSNIDVSVHSQNSLLSHSMEATQNPTQNGTSHQQSDFVRFSAEKDVKGSTVEHSPPPDEPQDEDIDQRGGGDPNVVGGAPAEDGYNWRKYGQKQVKGSEFPRSYYKCTHPNCPVKKKVERSQEGHITEIIYKGAHNHPKPPPNRRSALGSTNSLGDLQLDS…
>LrWRKY17
IQPICHHFKFHKMEKVKALEKKKLISELTQGKELVNQLKKQLDPLASPEECDLLLGKILSTLEKSLSILNLKALLLDGGINANNSTSSCSSISFLGNNHSPKSEVLDSSVDQLDKNIVSKKRKKSQQWTNQISISGTGHECPHEDGYSWRKYGQKDILGANHPRAYYRCTHRHTQGCLATKQVQRSDGNSSIFEVTYKGRHSCKVAQSNIFSLENQKRQKHNKKQEQAMEIFNSTPNHKVENFSITTKEEVFPPFSFPPTPLNLENIEETKLFSDSMAPFSSPIMSELPSYLSMLTSQNDEFGMDQILQSSDSDLTELISTPTSISNSTFGRDWDLSVDFEPNVKFDIEEFFSN
>LrWRKY18
NLHQSQCFFFFFFFSSSSSSSMADELRDFYYHQPYQEDSSVVQNIHMLDPSFMSYTNEYLHGSSSDYTNNSFGKPFGFSAPSPFSSIKDDHDIIKQDVNGNININNDVVGGGGGSETPVTPNSSISNSSSNEAAGDHEDSNKKDKQVKDESLEDGEDASKKENKAKKKGEKKQRPPKYAFMTKSEVDHLEDGYRWRKYGQKAVKNSPYPRSYYRCTSQKCQVKKRVERSYQDPSIVITTYEGQHNHHLPSTLRGNVARMLNPSTLTQQSPLMAPHAAFHQELIMAQMPHQFYGQGNAFGNSQMYYQNLTHPLHNQQMQLPPHDYGLLQDMVPSMFNLKQEP
>LrWRKY19
ASRIVLVMMLALDQKKRKSESTSSPNHNNNEAMKSVQALHSESSSSDEDSSPKKQREEHIKTSTSRVYVRTEAADTSLIVKDGYQWRKYGQKVTRDNPSPRAYFKCSYAPTCPVKKKVQRSVEDQSILVATYEGEHNHSKMDSAGPVTTSPSSRLNAKGTIGNTTSMPCSTTLVNNSGPTLTLDLAEPKALQNDQNKVNSTTSTSTPSGHKRKSPGSDHHQNRPEFQHFLIEQMASSLTKDPSFQAALAAAISGKFLQNNQTDK
>LrWRKY20
VVLFSNMSDNPFYHDYMGTGGINTFPFFGENPSNYDQPIPNNMQNPHQQFVPSSYMTLTECLHGSMDYNTLSSAFDMSCSNSEVVCPHVDNQDSSRKSNISVVAEPVLDSPLRETSVEIPPTPNSSISSTSNEAGGDIDSSKSKKHMQKKGCQEEGDDKSKKECKAKKKGEKKQKEQRFAFMTKSEIDNLEDGYRWRKYGQKAVKNSNFPRNYYRCTTQKCGVKKRVERSYEDPSIVITTYEGQHNHHCPATLRGNSSFLYSSSQFMPNFPPQLFAQMLPPTSNQNLLISSSAYINNSNYHQHQGSEYSLFGGGTNGSWMHKQEPS
>LrWRKY21
QQQQQQQIQENGQHDGKSTEEVIKQQHNHNNQNGYGQMVPRKFMDLGLAGSEAEEASLSSSEGRSGREKSRSPTNNMESGREDSPEKGPPGWGPNKIPRLGGNGSNKPADQQATEATMRKARVSVRARSEAPMITDGCQWRKYGQKMAKGNPCRAYYRCTMAAGCPVRKQVQRCAEDRTILITTYEGTHNHPLPPAAMAMASTTSSAARMLLSGSMPSADGLMNSNFFARTLLPCSSSMATISASAPFPTVTLDLTQSPNPLQLPRPPNQFQVPFSNSPHNNILANPAALLPQIFGQALYNQSKFSGLQLSQDLEGQHNSTLQSSINPSNHNPLADTVNALTNDPNFTAALAAAITSLIGNPGQSNNGVNNTTATPTTANNNNGSVTSNGNNNASNGNN…
>LrWRKY22
YLYLVYTSSYYSFFTHTEVWVICDRRKIMNGAERLTEPKLENSISQTLASTTTTTDAHQLSEVPVEYELPPFELPEKIKDRISVTRPETLNAQAGKEHQQRVPDEASSLELSSASVARSISSVLSPTLAERRSSAVLKCSTGEVAKQSSDAKVLPVVPVLKTPTRDGYNWRKYGQKQVKSPQGSRSYYRCTYSECSAKKIECSDHTNSVMEIIYRSQHNHDPPPRVNCLRESKSAVLPAPANDKSIIAHPNRNSNETVASSVKESLPIAETANQDSCGSDTDTEITIKEEHGDEPEIKKRSRKSDASCSESASKPGKKPKLVVHAACDVGISSDGYRWRKYGQKMVKGNPHPRNYYRCTSAGCPVRKHIERATDGTSALTITYKGVHDHDMPVPKKSNG…
>LrWRKY23
SRSNMKSPLLKNTSSDLEKIIGELNRGRELTCRLREMIKKPIEDEDEHNMLAEDLVGKILSSFCVTLSMLSSNECNEVSQVMKSTEEYSIGSCKSSSFKDRRGRYKRRRTLETSIKETSTLVDDGHAWRKYGQKQILNAKYPRHYFRCTHKFDQGCKANKQVQRIQENPPLFRITYYGHHTCKTFPKVSQMICDSPTDKDSNSVLLNFSSSNNHRHFLDMMVETVDIVDLSFDF
>LrWRKY24
QTFNNCSRVHPKKLSNKQMEKKIDNSISGVTVAREGHNHDEEDIRKALKDDEYKSAIAEVNEVKLENARLKMLLEQIEKDYNSLQTRFFNICQPDSKKSVSPTCTPENIADEEESELVSLRLGRSPSPNEAKKVDKKRSYDKTREEYHSCNQSNDGLKLGLDYSSGISESDIIKPSMDPSPVKVVGPTSEVVKTMRSDDGSVKRAGDDEASQPNVKRARVSVRTKCDYPTINDGCQWRKYGQKISRGNPCPRSYYRCSVAPLCPVRKQVQRCLEDMSVLITTYEGTHNHSLPIEATAMASTTSAAASMLLSGSSSSSQSAKDFRNLPNISKTTPLYLSNSSSNPFPTITLDFTTFPTTSSFTSFNFPSNFQSGSGFLSNSLNFSSPESATIPILGSGGL…
>LrWRKY25
YMQHEILDEELIGMRNENKKLTTMITTLCENYNTLQAHLLELLQNNSTHEEDNSKLLSSRKRKAEDLCCVNNSDINIEEASPKRPREITTNISTVCVKTATSDQTSVAKDGYHWRKYGQKVTRDNPFPRAYYKCSFAPTCPVKKKVQRSVKDPSVLVATYEGEHNHLHPSQAEETVSIINQGVTTDPRFLKKFMEDIDTNSLQQQLVEQMASSLTKNPSFKAAVATAISGDFLENLI
>LrWRKY26
PHIFPCIIFKITFLPENKNKKMDCGLNWEYNSLINELIQGMEHAKQLRAYFNSATSSDKIQELHFHMQMILSSFENSLSILKWTGSVTQTPLLIAPPVSNGAPESSISVDENPKIDDHQDYRYVSKKRKQMPTWSEQVRVSAENGYEGPTDDGYSWRKYGQKDILGAKYPRSYYRCTYRAMQNCWATKQVQRSDDDPALFEITYKGSHTCNLAFNSATTQAKSPEKHEFKKQANNPRIMQSNQMLANLQANLRVNTNGLDKKETTCSFPFSPTFSGFVDENLHFQMSQVDDNLVGGHSPSFVSPTTPESNYFSLPICQMNGSRRIHNLHHSESDIHDLFSANTSSTSSPIIGLEFPLERVEFDPNFPFDNSEFFR
>LrWRKY27
LKMMGYSKMNEQLAIQEAASAGLKSMGHLIQLVSHQQQEKNPVQLGEITDFTVSKFKNVISMLDRTGHARFRRGPVHVPVQAPVHPDSFTSLSLSPYVPAAKETAHPPAAAAQQQAVAAPRQRTGLTLDFTKPSVDRQSSAAAVKPKLFEGGVAMATTSTTTNSSSFMSSITGEGSVSNGKQGLVLPAVSAGKPPIAGKRCREHEHYEGVSSKISGSGSGSGKCHCKKRKSRVKKVMRLPAVSSRIADIPGDEFSWRKYGQKPIKGSLYPRGYYKCSSVRGCPARKHVERAMDDPAMLIVTYEGEHLHTQVAMQENNSQMVTFGSTEERK
>LrWRKY28
KERKKQKKKRKRGIISLTLYPLIRTRISSIFSLSFSISSLPFIIFYPSLHSFYQVFPHFYVVKNMAVELMSSGYRTDSFSSKMEETAVQEAATAGLQSVEKLIRLLSQSHQHQHQHQQQQQKPNFQDSSSSSSLPNNSSVNPDYREVADAAVNKFKKFISLLDKNRTGHARFRRGPIPKPHQDKFQLDQQQQQPFKTQTPRIEESDKPQVVTIPTTTKVYCPTPIQRLPPLPHNHHLQLVKNGSIERKDVSTTINFASASPATSFMSSLTGDTESSLQQSLSSGFQITNLSQVSSAGRPPLSTSFKRKCSSMDDTALKCNSAGGSSGRCHCPKKRKSRVKTVVRVPAISMKMADIPPDDYSWRKYGQKPIKGSPHPRGYYKCSSV RGCPARKHVERAF…
>LrWRKY29
HKMAVDLLGYSNMNEQLALQEATSAGLKSMDHLIRYVSHHQQQQQRQQQHQNPDCSELASFTVSNFKKVISILNRTHARFRRGPVQVSNPPQQQTVVAAVAVNQSQSQPKGLTLDFTKPKVVKAAPSTSSSSFLSTITGEGSVSNGRQFSSMNLPPRPPPASSGKPPIAGKRCRDHDLLSDEFSGKTSSSGNCHCKKRKIRTKQVIRVPAISSKTADIPADEYSWRKYGQKPIKGSPHPRGYYRCSSVKGCPRKHVERATDDPGMLIVTYEGEHRHYVQGIVTGTGDVSAGEKMMVFGSTCDKKKKD
>LrWRKY30
LKKGFSFFQVISSFLVMEDRLYKSPSFLKQEDSTGTPPDNAADSSFSGDEAAEVSMPSPRKSRRGAKKKVISVPIIEADGSRSKGEVYPPPDSWSWRKYGQKPIKGSPYPRGYYRCSSSKGCPARKQVERSRLDPTTLLITYCSEHNHQIPSATATKHHHHNNRPTTTTTTPTTSSPTTSTATATDATLLDNSTTEEPDVFAYQHDNGFSELAGELGWFSHLGTTSTTMMTSTSTSMVGSTWNDSDVALMLPIREEDQSLFGDLGELPECSVVFRRYSVETPCCGGTG
>LrWRKY31
CFFRPKEVPFQLFMAIELVMNYINTNSNNSTSFMSNLEEKTVVQEATSGLQSVEKFIKLLSHSQKQGNSASFIKQEKSTPMEIEIVADAAVTKFKNVISLLGRKRTGHARFRRAPIASPHPDNFKKDYYVETKVYCPTPIQQLPPKAYDRYNHQLCQNPNDGVVKKQELVTKTINFSEICRSNSFNMSTLTGETESKSFQISNISQVSSGVKPPLSSSSSSFKSRKCTLSDNDLSGKCSGSSGQCHCSKRRKLRLKRVVRVPAISMKLSDIPPDDYSWRKYGQKPIKGSPHPRAYYKCSSVRGCPARKHVERALDEPTMLIVTYEGEHNHSVSVAETSSLILESS
>LrWRKY32
LDDGYRWRKYGQKVVKGNPNPRSYYKCTFTGCPVRKHVERASHDLRAVITTYEGKHNHDVPAARGSGSYAMNKPPSGNNNNNHMHNNHMPIFSRPSVLTSHSNQGMNFNDTFFNNTTQNQPPITLQMLQSSGSTSSYSGFGTSSGSYMNQMQHMNKQISKEEPKDDLFFNSFLN
>LrWRKY33
TMFGSSTFQESSNISCHQTINPNFTFHDPLINMNQDHGHYNKYQDFDHTSFLDLLVDGDQEYSNSNNSYNASLYSQYTPFMQQEISTSTYSGNSSSTSSFDATPTNIHMNENSSMGMEKEKKAGKHAIAFRTKTQLEILDDGYKWRKYGKKKVKSNTYLRNYYKCSSGDCKVKKKVERDGTDSRYLITTYEGQHNHERPFVIYCHEMPTARLSNEWSLQATSL
>LrWRKY34
NKSLALGLDCKFEVSAKTSPTECSPVNLTPENSLEEANKEENGETSTWSPNKILKTMRNNGDGDDVTQQNPTKRARVSVRVRCDAPTMNDGCQWRKYGQKIAKGNPCPRAYYRCTVAPNCPVRKQVQRCAEDMSILITTYEGTHNHPLPLSATAMASTTSAAASMLLSGSSSSSDPSPQITATTTNTNSSTTSANLNGLNFYLSDTSKHKPPFYFPNSSISASAPNSLPTITLDLTSTSSSSTLSHLNRMSNNFPPRYNYNTSSTNLNFSSVLEYNSLPISWSNYANQAYNKNNQNFGSLTFSSRPNQENIFQSYLQRNNNNPTQSSLPPDTIAAATKAITSDPNFHSALAAALTSIMGNNGNIGNKSGENPNVTEPFPVLSSLPSSSNPNKCSSSFLN…
>LrWRKY35
XXGYNWRKYGQKQVKGSENPRSYYKCTFPNCPTKKKVERNLDGHITEIVYKGSHNHPKPQSTRRSSSQSIQNLAYNSNLDITNQANAFHENAHRDSLAVADNSSASFGEEDVDQGSPISKSGENDENEPEAKRWKGDNENEVISSASRTVREPRIVVQTTSDIDILDDGYRW
>LrWRKY36
VIMSRPSNTSSHISIFSLSTMENFPYNSNANPNNGDICSSNFIDTPENFELSDYLLPEDGSGDDFLSQNEFVQSVSSNGSYSNNLTPTTHKIKCTKGVIKKYNKVDAKSRVAFRFKSEKEVLDDGFKWRKYGKKMVKNSPNPRHYYKCSSGGCNVKKRVERDNADSSYVITTYVGIHNHESPFLLNYTQFPPNNIPTHGLHNLHL
>LrWRKY37
QLKKVCQVAADALSSDTWSWRKYGQKPIKGSPYPRGYYKCSTSKGCLARKQVERNRSDPKMFIVTYTAEHNHPMPTHRNSLAGISRHKTANSNKPTSSLPVASPVINSPAPENQESDIFEDDDDDEFGVSNVGLGKMEIPGDDFFEGLDDLDIPATAEISPGKFPGRLQFRWLANNAATTAAGGG
>LrWRKY38
VRPTNYHHHRFFFLLRGQTRRRVKMKETGGASAMSFPALTIPPRPSFDSFFSNMPSFSPGPMTLVSSFFSDQSPDSTDCPSFSQLLAGAMASPTGLPDDSGCQKKSGYKENRPLGLVLAQSPLFMIPPGLSPSGFLNSPGFLSPLQSPFGMSHQQALAHVTAQAAFSSSMESSDKEGKQFELLEVSQSENKTSSVALNKPACDGYKWRKYGQKKVKSSECPRSYY
>LrWRKY39
NNNNNNNSSNDGTNLFGPEMKRRNMFSRMLQISPTTRLAMSPCDSPMAAAVACSSQNPNVIGALVANDAIISPNSSKTCLVENSGLQISSPRNTGIKRRKSQAKKVVCIPAPAPANTRQGGEVVPSDLWAWRKYGQKPIKGSPYPRGYYRCSSSKGCSARKQVERSRTDPNMLVITYTSEHNHPWPTQRNALAGSTRSQPNNSKHTSTSKNNINNYQSQRSPADRSFKGDESNINNDNNTSSINVAQVNISTYPEVKEEVAEEDHHYHQQQLVEMPDIEFSKDSYQPILPDSSNEEFFADLVELEADPLNLLFAKTLSDDNSNKDSNTSTNNKDLADT
>LrWRKY40
QGPFGMSHQQVLAQLTAQATQAQSQMHVQPDYPSSSTAAAPSISQFQSLTSNGAANQQIPNIMKESSDVSLSDQRSEPASFVAVDKPADDGYNWRKYGQKHVKGSEYPRSYYKCTHPNCPVKKKVERSLDGQVTEIIYKGQHNHLPPQASKRSKESGNYNLQGGYELNSEGLAGNFNKPKEGEPSYSLRMKDQESSQANDQISGSSDSEEVGNAETRVDGRDIDERESKRAVEVQTSEAACSHRTVAEPRIIVQTTSEVDLLDDGYRWRKYGQKVVKGNPYPRSYYKCTSQGCNVRKHVERAATDPKAVITTYEGKHNHDVPAARNSSHNTANNSMSQLRPHNPVVNKPAAMRRTDFPSNEQQPIALLRFKEEQIT
>LrWRKY41
CFYCPNHYTPQISKLAIMAVELMMDYRNTRNTTNCINFVSKMEEKTVVQEAASGLESVEKLIRLLSQTQSQQIQQQKQGHLEQNNKSPMEIEIVADTAVTKFKKVISLLDRNRTGHARFRRAPLATSLSPSNSSKEIVDTKVYSPTPIQQFPLISYDHYSPMVKPKTISFSYSPEMSRTNSFNISSLTGETESKQQHSSSSAFQITTNLSQVSNSAGKPPLSSSSSLKRKCNLSQNGVSGKCSGSSGRCHCSKRRKLRLKRVVRVPAISMKLADIPPDDYSWRKYGQKPIKGSPHPRGYYKCSSVRGCPARKHVERAMDDPTMLIVTYEGEHNHSLSVAETSSLILESS
>LrWRKY42
AAVVERLSRIQNSSPFTFIIPPFKMDCAFNWEYKTLVNELTQGIEHTKQLREHFHSVASTYENQELLLQKILSCYEQSLMILKCSGSPIQSPPALPPSSGVIESSVSVDGSPRSDHKKRIFQDHQELIDISKRRKSQPTWTEQVKVSAETGFEGPTDDGYSWRKYGQKDILGAKYPRSYYRCTYRHMQNCWATKQVQRSDDDPTVFEITYRGTHNCHQATYSALQSTSPAETIEYNRQANYQTGQCPNQVLMNLKANLRVDTDAVDTNETACPFSFPPTFPGLTGGGYSPCFVSPTTPESNYYGLGMVHNLHHSESDLTDIFSANTSTTSSPIVGEFPLDHFELDPNFPFNNPNFFS
>LrWRKY43
LTTNIVRNIYIHMESPLPENSSTDLQRAIEGLIRGREFTRRLKEIIKKPLGGGEVATINMAEDLVGKIMESFSETLSVINSDDVRVVDTPFSDVEVKSPEDYSSGSCKNTSTLKDRRGCYKRRKTSESNIKESSDLVDDGHAWRKYGQKQILHATYPRFDFTIYPFFFNQEFVLIAE
>LrWRKY44
KKKKTKMEELLHENSRKKLINGLVQGKKFATQLQTLLQKPHTEHHGSVLADELVLKIWRSFTQAITELNTLGNSNKSLVQIEEVDQPDSGDRKSKECCSNSELKKKEKQGGKDKRGCYKRRKTSGSWVRESATTDDGCAWRKYGQKNILNSKYPRCYYRCSHKYDKECRATKQVQRIKEDPIIYRTTYFDHHVCKCSLKEPLHQIITSGEDSKLHSDISSALDGQDLMPSSPAIMADDFSVEGVVSIMTSSDLHGLDMDDISKFGDFHFEALEFS
>LrWRKY45
FASYSTFTQCAPQGSKQSKSMAKNQPSSSSSSRAAPMRPTITLPPRASLHNFFMGGPGPTGVSPGPMTLVSNFFSDSDSECPSFSQLLAGAMVSPADFSGLKETGDFGFKLNRPSGLVINESPFFSIPPGLSPGGLLFSPGQVVVKVCSCFGSFYCSFCFICYLIMLLLLPLIINVYYC
>LrWRKY46
HTLSLSLPPSLRETEKKKKGAMFSQSLFEDQDMSSQLGFFSFPPNNNMGISTTLPFIGYNQNTLKTLTMIPPSFAPSSDHSLNNESRHKEELTTSTIFGGPHLLSLQKSTANAWAWGEVNESSNIKRREFEHDHLGVSSIKMKKIKSSRRKVREPRFCFKTMSDVDVLDDGYKWRKY
>LrWRKY47
LLPSSIPPVYPLTGLPLLKTFGQYLLLPVFSKNPRVHLSLVLPFDRNQVRNGKSVICIEIKENKTIHQSLTPNTLEYNFLSLFFYHLWLCSTSPFSSSPFLS
>LrWRKY48
LMDPRFRYVGFTVNPQLNEFKNLGKSIAGGYCADTTLRLDSIGSSVPSIPAPKGIKRKWSSVGGSNDQQIGSSLCLRLGHSSSSSDSKGSSGAACTSMSSARDQNDEGSSMDLDLDFRLHLGNEKIPSSRKSAHPDSKKLAKGLAVDLELSLSSGAAESDVTTVHLLSTSPQSIMKAPQAIAGAFHTEEASTAIHWKSSNIFHPLQTPRENESSYLLNQAATEIKQVPVSVSPDLSSSIITNSKSSVTCTSGLTQQQQRSSSTKQCQFKGCVKGARGASGLCIAHGGGRRCQKLGCHKGAEGRTAFCKAHGGGRRCESLGCTKSAEGRTDFCIAHGGGRRCCQEGCSRAARGKSGLCIRHGGGKRCQKEGCTKSAEGLSGLCISHGGGRRCQYPDCTKG…
>LrWRKY49
KNKYTEAPMTPTVLLITYSSDHNHPLPAAATKHRHPTTTSAATDVDFSATTPEDQSAIFTYQPHDNFLEINAGELGWFSDGGSTLMESTSSLVGSTWVDDDVALMLPIGEEDQSLFGDLDELPECLVVFRRYRVESPIHSE
>LrWRKY50
HNHHCPATLRGNAAAALLSPSFLSSQQLIHPHEQQLFYNPNLPINSSFYNTDYNYHQQPQLGPDYQYGLFQDMVASLIRKRES
>LrWRKY51
RKYGQKPIKGSQYPRGYYKCSTLKGCSARKQVDRNRSDPNMFIVTYTSEHNHPTPTHRSSLSGITRQKPVNSQASSAGDG
>LrWRKY52
ILTKALFFFSMSDNNPFHHDYAFPFFGENPSIYNDHQVPQANTQNPHHNQDFDYPSSYMSTLTECLHGGSMDHYNSLSSSFGINNNCLSSSEVVCPPIDHHQESSRKNSVDQIPLTPNSLVSSSSNSEAGGHEEDSSKINKDLQAEDQCEDGDDDKSKKVSKAKKKGEQKQKEPRFAFMTKSEIDNLE
>LrWRKY53
VRIMGTPRDQATDEVFPENLEQKMEPDPDPDPAPAPATSKPELNEKRSFESFSADVVSGELRKRLSADADAQASKNNQEESKHPSTCQEVSSKVQLSQSNKRIKSEADASGSSQLSSLPKDSDAKSCGSESGVEEKVVPLLSGKASDSSGQMQSPNTEVSASESYQQRVTYPIKYEKALDKLQPRRN
>LrWRKY54
SASAPFPTITLDLTQTQNSLPYHQRTTPNAQFQVPFQSSPQHPNFITSMPPPPMPQGLHNQSKFSGLQVSQDAKLQPQQLQHVQNHPSFTDTLTAATAAITADPNFTAALAAAISSMITGS
>LrWRKY55
NTKILRSIGVILGEEIFLQSGKSRILSHNSSTWNRCFNLQNTRKGRPMNRKFSPNLIFQSLNTSYVQYTMEANQLQNTQKLSRIVISFVKISDRF
>LrWRKY56
GRSISYMENKNKADQSSNDDEGCAEDNIFLKFGKARNEREEDKSKPSSPQHKDFMTIDKVEGAPDMVKREGSPAELNSMASSSTQKEQDDQLASAKFEMQEVMQENQRLRLLLDRVMKDFRNLQNQYHDIVQREAEKSSSTVNTTQHHESDQLVSLSLGRTTSDMKKDELSKFFKKGEAHDEEEVNKSLALG
>LrWRKY57
AATTTTTIIAASDVAVSELEQEKSTSEFANPSEPNDSDEKFANLGESSLISSNEFGWFSDLIECTSTTMLESPILTEVEVTDIDMASTLTMQEEDDSLFADLGELPECSRVFGHGMIEREEERRRHSLTTWCGTTG
>LrWRKY58
HFFVLNRGYYKCSTSKGCLARKQVERNRSDPKMFIVTYTAEHNHPMPTHRNSLAGISRHKTANSNKPTSSLPVASPVINSPAPENQESDIFEDDDDDEFGVSNVGLGKMEIPGDDFFEGLDDLDIPATAEISPGKFPGRLQFRWLANNAATTAAGGG
>LrWRKY59
GTYSTGMCSPFQLPQKTMENNYQGDLADIFRGSTTGGNNTATSGVSSTTVVPAAAGADGWQLPSHPINLEPSVQDFGDPFCNLRDPLFHDLDMMPASSSLFSSTEDNSSSSNNNN
>LrWRKY60
GVALENSDHQVGIFKNKPVFGFNNLSPSSNNHTNYMMMNCREEQAVDEKREVDFFSDKRNLQPMDHLFIKKEDSHSENTTSTRSELVVNTGLQLVTANTGSDQSTVDDGISSEILEDKRAQNELAQLQVELERMNVENQRLRGMLTQVSNNYAALQMHLAALMQQQNSRTENTQDHKTVEAKSEEKMQEKIVPRQFLELGPSGDELSHNSHSSSEERTVSDSPRNHVQVTRHKGIIGREESPESESWVPSKVPKLNSSIPVDQATDATMRKARVSVRARSEAPMISDGCQWRKYGQKMAKGNPCPRAYYRCTMAVGCPVRKQVQRCAEDRTILITTYEGTHNHPLPPAAMAMASTTSAAANMLLSGSMPSADGMMNANFLARAMLPCSSNMATISASAP…
>LrWRKY61
SVEKLIRLLSQPQNHSQKLKQNFQDPSLKANPTIDFSADYLAVADTAVNKFKKFISLLDKSRTGHARFRRGPVTTSPKEKENPQSGSKICCPTPVQRLPPLPQNSHVQVGSLERKESTTTINFATPSPANSFISSLTGDSESLQPSMTTSSGFQITNLSSAGRPPLSTSSFKRKWSSMDDMAVKCSSAGGSPGRCHCPKKRKSKVKRVVRIPAISMKM
>LrWRKY62
SYYKCTSAGCPVRKHVERAPDNLKSVITTYEGKHNHEVPSVNKTNSAASVTGNQASASTANGQSSILASPKRHKVSNLGMQVQDFNFQFERKPFDYVRPSFLGSHLTDLRFGATSPLYDLNFPTNLQSPVSYTSFLSRPFTPLQMPNFPLSLSLPTNLPVGPSMVPSLGGLHFNDHSLTPNGVSSHSSLAVGDQKHIHENNNNNNDKNSRLLKDNEEMYDHQNAVSSTVLCSHIMDNFPS
>LrWRKY63
WKMAYPLIMVKIKSEEEKKKHTPLHHSPCQVILTHNILIYLNAVERKYVYSESVCCQSISIFQIDVSKGKKSEVMEFQKAVYIKDGQAFTSNRTASI
>LrWRKY64
EGKHNHDVPAARNSSHVNAGVSNTHQTPITAPAQNHLHRPEPSQLQNAMARFDRQPSLGSYGLAGRPHLGPTPGFSYGMNQQGLSGLAMAGFHPNLGQPRPMHDMGFMFPKEEPKVEPMSDPGLNLSNGSSVYQQFVNRLPLGPQM
>LrWRKY65
IQYNYSMPFLRKFTIDVYSIHSIFNPLLPHLSFVTTYFYTIFLLLYHFPSYHSNAGNRTILR
>LrWRKY66
QENMEDDWDLTAVVRSCFASNTTTTTGPTSSSGSATTSSSNFQPRVDDNNNNSLFCFQDLMEQPRILTKDSSTGFGELHELCKPFFIESEKSTPKRLLPISPVSVHGKLQDLPPSQQQQQHHQLNNNKFIQPKRPLSVNASATCTLHAQSPRTKRRKNQLKKVCQ
>LrWRKY67
KTNMSESPNLKQVKTTMLEHPYLNRVKINMSALTWLFILVQIEC
>LrWRKY68
MIVFSFICNNQHSSIIKCSLHMFTCWTSSDTATLVISPENFRPTKFRFKLNSSSTQGKNRARRWLKHTKHIVIMDIICILYLIYKI
>LrWRKY69
KKKMINCLHPVWKNPIILASSNSPFFHNLRNTKQVKCVESRKLYSKKSRIVCGFLPVDPWAPNIDSQSIASQLFAFSLFPYVGFLYFITKSKTAPKLTLFGFYFLLAFVGATIPAGIYAKVHYGTSLSNVDWLHGGAESLLTLTNLFIVLGLRESIRKAENSEESKTNDASRVIEEKKSSV
>LrWRKY70
CICYDGKLFSSFWFTCKELSKHGMDDFGYRGYYRCSSSKGCSAKKQVERCSKDASLFIITYTSTHNHPGQNLPNNEDSALTLQQQDQEPTVDQHISLQDNDDDDPQRKSPLNSTTTTATSISQGIHEENLSADNFLGAVSHDDFLPLSYPQLMKFPKSELSEENDFYDELGELQLPPSSTSSAGIFEEAILVDPS
>LrWRKY71
YMASSGGNMNTFMNAFNGNNYSFSSSQFMTSSFSDLLSDNNDNNNNKNWGFSDQRIMNNSNKDEIPKFKSFPPSSLPMISSSSPASPSSYLAFAPSLSPSVLLDSPVMFNNSNTLASPTTGSFGNMNSKEDNSRTCDFSFQSRPTTSSSMFQSSAPRNSLEDLMMRQQHTNEFSATKLTGVKSEVAPIQSFSQDNMQNNPTPVHYCQPPQYVREQKAEDGYNWRKY
>LrWRKY72
LLKKIIMDSRSHYLMPLIPATKEIKQNWNVIRGSIDQQIDSSLCLSLGHSSSPSESKRSSGVVCTSISPAKESDESSMDLEVDFGLYLANEKTPRPKSLTTSDPKVLDAGPAIDLELSLSSSAAESDVTTLHLASTSPQSIVKVPHGFLGAFQTDEVSTDSHWKTGSDFHPLHVPQHKGPSYCSKQAIKEVEPSPKSPVSCTSGSTKQQQRRCCIKQCQFKGCVKGARGASGFCIAHGGGRRCQKPDCHKGAEGRTAFCKAHGGGRRCEFLGCTKSAEGRTNFCIAHGGGRRCSHEGGCTRAARGKSGLCIRHGGGRRCQEENCTRSAEGLSGLCISHGGGRRCQYPQCPKGAQGSTAFCKAHGGGKRCTFEGCNKGAEGSTPFCKGHGGGKRCSFKGG…
>LrWRKY73
CPSARSDKMDRADTSGFVSGGDVELARSDTTLRLDCFGYGGNECVRFGTNSRSHVMQQNAVDDGCKLVLGLGPTSTHCSDDYYPSGSIKNKGFTALLSQGLSSETDSILKLGLSGSIDETSNAFDFSAITQSAAGAPHYLDQQSSHGNRPAIPLLDEGSTSAKKSGGYMPSLLLAPRIENSQLSFQNKELFEQGAKSHSHFHLPELSSEPSCISDYSMSTMSEPTTMATSSHKIANPKRCKFPGCSKGARGATGLCIGHGGGQRCQKPGCNKGAESKTAYCKAHGGGKRCDYLGCTKSAEGKTDYCIAHGGGRRCGFTGGCTRAARGKSGLCIKHGGGKRCNVEGCTRSAEGKVGLCISHGGGRRCQFPSCTKGAQGSTLFCKAHGGGKRCIFAGCTKG…
