# Supplementary material for: Identification and expression analysis of the WRKY gene family during different developmental stages in Lycium ruthenicum Murr. fruit
Source: PeerJ. 2020 Oct 28;8:e10207. doi: 10.7717/peerj.10207 (PMC7602686; doi:10.7717/peerj.10207)
Supplement: Supplemental Information 2 [file peerj-08-10207-s002.xlsx]

## Sheet: Sheet1
	Supplementary Data 2: The WRKY protein database IDs for A. thaliana and O. sativa.
	Database ID	Gene Name	Database ID	Gene Name
	>AT1G13960.1	ATWRKY4	>Os12t0116700-01	OsWRKY64
	>AT1G18860.1	ATWRKY61	>Os12t0597700-01	OsWRKY94
	>AT1G29280.1	ATWRKY65	>Os12t0507300-00	OsWRKY96
	>AT1G29860.1	ATWRKY71	>Os12t0116600-01	OsWRKY95
	>AT1G30650.1	ATWRKY14	>Os12t0116400-00	OsWRKY97
	>AT1G55600.1	ATWRKY10	>Os11t0490900-01	OsWRKY72
	>AT1G62300.1	ATWRKY6	>Os11t0117600-00	OsWRKY50
	>AT1G64000.1	ATWRKY56	>Os11t0117500-01	OsWRKY40
	>AT1G66550.1	ATWRKY67	>Os11t0117400-00	OsWRKY100
	>AT1G66560.1	ATWRKY64	>Os11t0116900-01	OsWRKY46
	>AT1G66600.1	ATWRKY63	>Os09t0481700-01	OsWRKY90
	>AT1G68150.1	ATWRKY9	>Os09t0417800-02	OsWRKY62
	>AT1G69310.1	ATWRKY57	>Os09t0417800-01	OsWRKY62
	>AT1G69810.1	ATWRKY36	>Os09t0417600-01	OsWRKY76
	>AT1G80590.1	ATWRKY66	>Os09t0334500-01	OsWRKY74
	>AT1G80840.1	ATWRKY40	>Os08t0499300-01	OsWRKY30
	>AT2G03340.1	ATWRKY3	>Os08t0386200-01	OsWRKY69
	>AT2G04880.1	ATWRKY1	>Os08t0276200-01	OsWRKY89
	>AT2G21900.1	ATWRKY59	>Os08t0235800-00	OsWRKY25
	>AT2G23320.1	ATWRKY15	>Os07t0680400-01	OsWRKY47
	>AT2G24570.1	ATWRKY17	>Os07t0596900-00	OsWRKY88
	>AT2G25000.1	ATWRKY60	>Os07t0583700-01	OsWRKY87
	>AT2G30250.1	ATWRKY25	>Os07t0111400-00	OsWRKY29
	>AT2G30590	ATWRKY21	>Os06t0649000-01	OsWRKY28
	>AT2G34830.1	ATWRKY35	>Os06t0504900-00	OsWRKY31
	>AT2G37260.1	ATWRKY44	>Os06t0158100-00	OsWRKY113
	>AT2G38470.1	ATWRKY33	>Os06t0146250-00	OsWRKY73
	>AT2G40740.1	ATWRKY55	>Os06t0105350-01	OsWRKY86
	>AT2G40750.1	ATWRKY54	>Os05t0583000-01	OsWRKY8
	>AT2G44745.1	ATWRKY12	>Os05t0571200-01	OsWRKY19
	>AT2G46130.1	ATWRKY43	>Os05t0565900-00	OsWRKY49
	>AT2G46400.1	ATWRKY46	>Os05t0537100-00	OsWRKY7
	>AT2G47260.1	ATWRKY23	>Os05t0478800-00	OsWRKY54
	>AT3G01080.1	ATWRKY58	>Os05t0478700-00	OsWRKY84
	>AT3G01970.1	ATWRKY45	>Os05t0478400-00	OsWRKY48
	>AT3G04670.1	ATWRKY39	>Os05t0474800-01	OsWRKY70
	>AT3G56400.1	ATWRKY70	>Os05t0343400-01	OsWRKY53
	>AT3G58710.1	ATWRKY69	>Os05t0322900-01	OsWRKY45
	>AT3G62340.1	ATWRKY68	>Os05t0321900-01	OsWRKY75
	>AT4G01250.1	ATWRKY22	>Os05t0233100-00	OsWRKY56
	>AT4G01720.1	ATWRKY47	>Os05t0183100-01	OsWRKY67
	>AT4G04450.1	ATWRKY42	>Os05t0137500-00	OsWRKY5
	>AT4G11070.1	ATWRKY41	>Os05t0129800-01	OsWRKY109
	>AT4G12020.2	ATWRKY19	>Os04t0605100-01	OsWRKY68
	>AT4G18170.1	ATWRKY28	>Os04t0597300-01	OsWRKY37
	>AT4G22070.1	ATWRKY31	>Os04t0545000-01	OsWRKY36
	>AT4G23550.1	ATWRKY29	>Os04t0471700-00	OsWRKY35
	>AT4G23810.1	ATWRKY53	>Os04t0287400-01	OsWRKY51
	>AT4G24240.1	ATWRKY7	>Os03t0855100-01	OsWRKY80
	>AT4G26440.1	ATWRKY34	>Os03t0741400-01	OsWRKY6
	>AT4G26640.2	ATWRKY20	>Os03t0335200-01	OsWRKY79
	>AT4G30935.1	ATWRKY32	>Os03t0321700-01	OsWRKY55
	>AT4G31550.1	ATWRKY11	>Os02t0770500-00	OsWRKY32
	>AT4G31800.1	ATWRKY18	>Os02t0698800-01	OsWRKY66
	>AT4G39410.1	ATWRKY13	>Os02t0652100-01	OsWRKY34
	>AT5G01900.1	ATWRKY62	>Os02t0462800-01	OsWRKY42
	>AT5G07100.1	ATWRKY26	>Os02t0265200-01	OsWRKY39
	>AT5G13080.1	ATWRKY75	>Os02t0181300-01	OsWRKY71
	>AT5G15130.1	ATWRKY72	>Os01t0842801-00	OsWRKY82
	>AT5G22570.1	ATWRKY38	>Os01t0826400-01	OsWRKY24
	>AT5G24110.1	ATWRKY30	>Os01t0820700-00	OsWRKY11
	>AT5G26170.1	ATWRKY50	>Os01t0820400-01	OsWRKY22
	>AT5G28650.1	ATWRKY74	>Os01t0750100-03	OsWRKY13
	>AT5G41570.1	ATWRKY24	>Os01t0734000-01	OsWRKY23
	>AT5G43290.1	ATWRKY49	>Os01t0730700-01	OsWRKY14
	>AT5G45050.1	ATWRKY16	>Os01t0714800-01	OsWRKY26
	>AT5G45260.1	ATWRKY52	>Os01t0656400-00	OsWRKY15
	>AT5G46350.1	ATWRKY8	>Os01t0624700-01	OsWRKY12
	>AT5G49520.1	ATWRKY48	>Os01t0584900-01	OsWRKY77
	>AT5G52830.1	ATWRKY27		OsWRKY102
	>AT5G56270.1	ATWRKY2	>Os01t0186000-01	OsWRKY10
	>AT5G64810.1	ATWRKY51		OsWRKY9
			>Os01g40430.1	OsWRKY27
