# Supplementary material for: Identification and expression analysis of the WRKY gene family during different developmental stages in Lycium ruthenicum Murr. fruit
Source: PeerJ. 2020 Oct 28;8:e10207. doi: 10.7717/peerj.10207 (PMC7602686; doi:10.7717/peerj.10207)
Supplement: Supplemental Information 3 [file peerj-08-10207-s003.xlsx]

## Sheet: Sheet1
Supplementary Data 3: The primer sequences used for the RT-qPCR analysis of the 23 LrWRKYs.
wrky seq no	ID	Primers Seq	PCR Product size	Tm ˚C
1	WRKY3-F1	TGAGCGGAGCCAGACATAGC	80	61.1
	WRKY3-R1	TAAACCACCTCGACTTCTTCATGTA	80	60.3
2	WRKY4-F1	TACACCAGTTGTTAAGCCCATCC	104	60.9
	WRKY4-R1	GTGGCGGAAATACGGTCAAA	104	60.8
3	WRKY5-F1	TGAGTTTAATGGTGGGTCAATCG	100	61.6
	WRKY5-R1	CTTTCCCCACTTCAGAGTCCTTT	100	60.9
4	WRKY7-F1	AACTCTTGGACTCACCTGTTCTTTT	112	60.1
	WRKY7-R1	AGAGCAGTTCCAATCAGGGTGT	112	60.2
5	WRKY8-F1	CGTCTGGAGAATGGGAACACC	102	61.5
	WRKY8-R1	CATAGTGGCATGAGCCGATTT	102	60.2
6	WRKY14-F1	AAACCCTCACCCTCTTCATTCA	114	60.2
	WRKY14-R1	CAACAAATGAAGCAGCAACAAGC	114	62.7
7	WRKY15-F1	AGCTCCGATTCGCCACGTT	120	62.8
	WRKY15-R1	GTGGTGTCAGTGCCAATTAAAGAA	120	61.1
8	WRKY16-F1	ATCACCCAAAACCGCCACC	95	62.6
	WRKY16-R1	TGCAGAACAAGGTGGGGCA	95	62.7
9	WRKY17-F1	CAAGGGCTTATTATCGGTGCA	115	60.5
	WRKY17-R1	TTGAGGTCACATACAAAGGAAGACA	115	60.7
10	WRKY18-F1	CCATCTACTCTTCGTGGGAACG	129	61.3
	WRKY18-R1	GGCTCAAATGCCTCATCAATTC	129	61.2
11	WRKY20-F1	CGAGCGTTGAAATTCCACCA	129	61.7
	WRKY20-R1	AAAGGGTGTCAAGAAGAAGGAGATG	129	62.4
12	WRKY21-F1	TCCGTGTCCTCGGGCTTAT	83	60.2
	WRKY21-R1	AAGTTCAAAGATGTGCAGAGGACA	83	60.8
13	WRKY22-F1	AATCCCCATCCAAGGAACTACTATC	87	61.4
	WRKY22-R1	GAGGGCTACAGATGGCACAAGT	87	60.8
14	WRKY23-F1	TTTACTCTTTACAATCACCACCCTCC	92	62.4
	WRKY23-R1	CCTTCTTCAACGAGCCAGGC	92	62.2
15	WRKY25-F1	CCTCAGTGGCGAAAGATGGA	114	60.7
	WRKY25-R1	GCACCAACATGCCCAGTCA	114	60.3
16	WRKY27-F1	ACAGGGTTGACGCTTGACTTTAC	100	60.3
	WRKY27-R1	TGGTGTTGCGATGGCGA	100	60.1
17	WRKY28-F1	CTTGGAGAAAATATGGTCAAAAGCC	86	62.9
	WRKY28-R1	AGCAGTGTCCGAGGATGTCCA	86	62.5
18	WRKY29-F1	ATGTAGTAGTGTAAAAGGATGTCCGG	89	60.5
	WRKY29-R1	TGCTTATCGTGACTTATGAGGGAG	89	60.6
19	WRKY30-F1	GACAGCCACAGACGCCACAT	99	61.3
	WRKY30-R1	ATTCTCCGAACTCGCAGGTGA	99	62
20	WRKY31-F1	TCGGGGCTTCAAAGTGTCG	116	61.6
	WRKY31-R1	GACCCCAATGGAGATTGAAATAGT	116	60.6
21	WRKY40-F1	GGTAATGTGATTGAAGTATCGCTGAC	119	61.5
	WRKY40-R1	GGCTACATTCATTGCGACTTGG	119	62.2
22	WRKY41-F1	CCATGCCAGATTTAGAAGAGCC	110	60.8
	WRKY41-R1	CTCCTACTCCAATCCAACAATTCC	110	61.2
23	WRKY43-F1	GAAGGGTTAATCCGTGGTCGT	112	60.5
	WRKY43-R1	ATATGGCTGAGGATTTAGTTGGGA	112	61.3
