# Supplementary material for: Identification and expression analysis of the WRKY gene family during different developmental stages in Lycium ruthenicum Murr. fruit
Source: PeerJ. 2020 Oct 28;8:e10207. doi: 10.7717/peerj.10207 (PMC7602686; doi:10.7717/peerj.10207)
Supplement: Supplemental Information 4 [file peerj-08-10207-s004.xlsx]

## Sheet: Sheet1
Supplementary Data 4: The raw data for 23 selected LrWRKYs RT-qPCR analysis.
Gene	Ct values
	Green ripeness stage (Rs 1)			Veraison ripeness stage (Rs 2)			Complete ripeness stage (Rs 3)
LrEF1-α	21.94	21.1	22.97	22.65	22.71	23.83	23.67	24.61	23.7
LrWRKY3	29.28	29.11	29.03	31	31.1	31.08	32.82	32.93	32.86
LrWRKY4	28.48	28.51	28.61	30.8	31.17	31.2	33.16	33.22	33.27
LrWRKY5	29.88	30	29.97	31.92	31.97	32	33.57	33.89	33.63
LrWRKY7	28.91	28.96	28.81	31.57	31.27	31.29	35.49	35.11	35.12
LrWRKY8	29.2	29.45	29.07	31.82	31.86	32	33.7	33.98	34
LrWRKY14	26.54	26.43	26.4	29.9	29.83	30	31.34	31.25	31
LrWRKY15	29	28.94	28.89	29.88	29.87	29.84	31.63	31.63	31.78
LrWRKY16	28.27	28.7	28.43	30	29.98	29.93	33.8	33.42	33.55
LrWRKY17	29.84	29.68	29.72	31.7	31.84	31.75	33.47	33.38	33.44
LrWRKY18	29.32	29.16	30.21	32.54	32.71	33.64	35.57	34.6	34.1
LrWRKY20	28.21	28.37	28.65	31.68	31.37	31	33.92	34.36	34
LrWRKY21	26.8	26.63	26.87	29.38	29	29.13	31.64	31.68	31.55
LrWRKY22	29.78	29.74	29.81	31.81	31.73	31.78	33.37	33.49	33.45
LrWRKY23	30	29.85	29.89	32.25	32.08	31.79	34.34	33.83	34.35
LrWRKY25	28.09	28.05	28.21	31	30.93	30.64	34.41	34.37	34.02
LrWRKY27	28.39	28.47	28.26	31.38	31.58	31.71	33.65	33.58	34.19
LrWRKY28	27.93	28	27.84	31.66	31.79	31.51	34.34	34.43	34.26
LrWRKY29	29.22	28.79	28.95	31.47	31.16	32	34.97	35.11	34.59
LrWRKY30	31.18	31	31.17	33.42	33.13	33.1	33.77	33.82	33.68
LrWRKY31	29.25	29.68	29.08	32.21	32.04	31.9	35.51	34.59	35.71
LrWRKY40	26.51	26.52	26.62	28.72	28.81	28.73	30.7	30.59	30.68
LrWRKY41	28.64	28.68	28.74	30.75	30.66	30.62	32.34	32.42	32.29
LrWRKY43	27.72	27.7	27.5	30.84	30.94	30.86	33.91	33.68	33.66

## Sheet: Sheet2
ID	CT value-Ref gene	CT value S3 (ie. AA) gene of interest	Δct-AA	ΔΔct-AA	the relative expression level-AA	CT value S2 (ie. AA) gene of interest	CT value-Ref gene	Δct-AA	ΔΔct-AA	the relative expression level-AA	CT value S1 (ie. AA) of interest	CT value-Ref gene	Δct-AA	ΔΔct-AA	the relative expression level-AA
Control	22.0033	29.7941	7.79072	0	1	31.7838	22.68	9.10377	0	1	33.4542	23.9933	9.46087	0	1
WRKY3	#REF!	28.4667	#REF!	#REF!	#REF!	31.175	22.68	8.495	-0.608768	1.52496	33.82	23.9933	9.82667	0.365797	0.77604
WRKY4	22.0033	28.0633	6.06	-1.73072	3.31894	30.985	22.68	8.305	-0.798768	1.73962	34.95	23.9933	10.9567	1.4958	0.354585
WRKY5	22.0033	29.7267	7.72333	-0.0673913	1.04782	32.83	22.68	10.15	1.04623	0.484231	34.8633	23.9933	10.87	1.40913	0.376539
WRKY7	22.0033	28.5933	6.59	-1.20072	2.29855	31.92	22.68	9.24	0.136232	0.909893	34.9733	23.9933	10.98	1.51913	0.348896
WRKY8	22.0033	28.8633	6.86	-0.930725	1.90623	32.12	22.68	9.44	0.336232	0.792107	33.7367	23.9933	9.74333	0.282464	0.822186
WRKY14	22.0033	26.7567	4.75333	-3.03739	8.21005	29.115	22.68	6.435	-2.66877	6.35886	31.1767	23.9933	7.18333	-2.27754	4.84849
WRKY15	22.0033	26.8833	4.88	-2.91072	7.51996	30.05	22.68	7.37	-1.73377	3.32595	31.84	23.9933	7.84667	-1.6142	3.06142
WRKY16	22.0033	28.7567	6.75333	-1.03739	2.05251	30.19	22.68	7.51	-1.59377	3.01837	33.7933	23.9933	9.8	0.33913	0.790518
WRKY17	22.0033	28.19	6.18667	-1.60406	3.03997	31.705	22.68	9.025	-0.0787681	1.05612	35.19	23.9933	11.1967	1.7358	0.300243
WRKY18	22.0033	29.5633	7.56	-0.230725	1.17342	32.625	22.68	9.945	0.841232	0.558167	34.7567	23.9933	10.7633	1.30246	0.405433
WRKY20	22.0033	28.4767	6.47333	-1.31739	2.49215	31.525	22.68	8.845	-0.258768	1.19646	35.3933	23.9933	11.4	1.93913	0.260774
WRKY21	22.0033	26.6667	4.66333	-3.12739	8.73853	29.945	22.68	7.265	-1.83877	3.57704	32.03	23.9933	8.03667	-1.4242	2.68366
WRKY22	22.0033	29.8667	7.86333	0.0726087	0.950917	32.48	22.68	9.8	0.696232	0.617182	34.8167	23.9933	10.8233	1.36246	0.388918
WRKY23	22.0033	29.8	7.79667	0.00594203	0.99589	31.665	22.68	8.985	-0.118768	1.08581	34.0067	23.9933	10.0133	0.552464	0.681855
WRKY25	22.0033	28.7133	6.71	-1.08072	2.1151	31.135	22.68	8.455	-0.648768	1.56783	33.6	23.9933	9.60667	0.145797	0.90388
WRKY27	22.0033	27.6333	5.63	-2.16072	4.47139	31.59	22.68	8.91	-0.193768	1.14375	34.42	23.9933	10.4267	0.965797	0.511995
WRKY28	22.0033	28.0533	6.05	-1.74072	3.34203	31.725	22.68	9.045	-0.0587681	1.04158	34.44	23.9933	10.4467	0.985797	0.504947
WRKY29	22.0033	28.8867	6.88333	-0.907391	1.87565	32.165	22.68	9.485	0.381232	0.767782	34.89	23.9933	10.8967	1.4358	0.369643
WRKY30	22.0033	31.1167	9.11333	1.32261	0.399811	33.775	22.68	11.095	1.99123	0.251524	33.7533	23.9933	9.76	0.29913	0.812742
WRKY31	22.0033	29.6933	7.69	-0.100725	1.07231	32.905	22.68	10.225	1.12123	0.459701	35.27	23.9933	11.2767	1.8158	0.284047
WRKY40	22.0033	26.65	4.64667	-3.14406	8.84007	28.91	22.68	6.23	-2.87377	7.32977	30.8467	23.9933	6.85333	-2.60754	6.09462
WRKY41	22.0033	27.59	5.58667	-2.20406	4.60774	30.46	22.68	7.78	-1.32377	2.50319	32.8533	23.9933	8.86	-0.60087	1.51663
WRKY43	22.0033	27.2567	5.25333	-2.53739	5.80538	30.09	22.68	7.41	-1.69377	3.23501	33.36	23.9933	9.36667	-0.0942029	1.06748
			7.79072					9.10377					9.46087

## Sheet: Sheet3
								1	2	3
