# Supplementary material for: Identification and expression analysis of the WRKY gene family during different developmental stages in Lycium ruthenicum Murr. fruit
Source: PeerJ. 2020 Oct 28;8:e10207. doi: 10.7717/peerj.10207 (PMC7602686; doi:10.7717/peerj.10207)
Supplement: Supplemental Information 5 [file peerj-08-10207-s005.xlsx]

## Sheet: Sheet1
Supplementary Data 5: FPKM values for all the 44 LrWRKYs with conserved WRKY domain.
Gene Name	developmetal stages FPKM values
	Rs 1	Rs 2	Rs 3
>LrWRKY1	1.06336	0.102172	0
>LrWRKY2	0	0.215606	0.266108
>LrWRKY3	3.1845	5.63532	5.74744
>LrWRKY4	12.6019	11.9655	11.2549
>LrWRKY5	14.2847	14.8091	14.9054
>LrWRKY6	0.185249	1.63901	0.621099
>LrWRKY7	17.7259	78.4182	65.4159
>LrWRKY8	9.24367	7.23416	7.30875
>LrWRKY9	4.11032	0.773063	0.675683
>LrWRKY10	2.05314	1.99064	1.43896
>LrWRKY11	4.62583	3.42052	3.64898
>LrWRKY12	0.915541	0.557714	0.710364
>LrWRKY13	2.18166	1.011	1.00886
>LrWRKY14	19.1486	10.3643	10.858
>LrWRKY15	0.894946	14.4505	13.9438
>LrWRKY16	27.648	22.9273	22.5094
>LrWRKY17	5.31048	5.95564	4.56358
>LrWRKY18	0.840976	8.18491	6.01423
>LrWRKY19	1.35378	3.19054	3.12685
>LrWRKY20	0.85064	12.3883	11.1102
>LrWRKY21	6.63319	12.7538	12.0302
>LrWRKY22	17.0251	17.128	16.1787
>LrWRKY23	8.53734	11.0361	10.4259
>LrWRKY24	0.180496	1.24973	0.985661
>LrWRKY25	6.59656	3.37054	2.72472
>LrWRKY26	0.22425	3.10268	1.97732
>LrWRKY27	27.9677	5.70856	5.30274
>LrWRKY28	54.2812	130.1	127.229
>LrWRKY29	15.9794	10.2957	9.21309
>LrWRKY30	1.54906	5.45733	4.98068
>LrWRKY31	7.05001	34.9303	36.4325
>LrWRKY32	0.563997	1.86523	0.776221
>LrWRKY33	1.13419	0.47349	0.464953
>LrWRKY34	1.13419	0.47349	0.344677
>LrWRKY35	1.13419	0.47349	0.864486
>LrWRKY36	0.433369	0.81491	0.385284
>LrWRKY37	0.741057	0.576996	0.773573
>LrWRKY38	4.60231	3.38953	2.86597
>LrWRKY39	0.344864	1.52723	1.69169
>LrWRKY40	3.52094	12.3313	11.7149
>LrWRKY41	20.0796	18.8956	17.5126
>LrWRKY42	1.89907	2.95297	2.53929
>LrWRKY43	25.4865	9.53544	8.85698
>LrWRKY44	2.2714	0.757496	0.532573
