# Supplementary material for: Identification and expression analysis of the WRKY gene family during different developmental stages in Lycium ruthenicum Murr. fruit
Source: PeerJ. 2020 Oct 28;8:e10207. doi: 10.7717/peerj.10207 (PMC7602686; doi:10.7717/peerj.10207)
Supplement: Supplemental Information 6 [file peerj-08-10207-s006.xlsx]

## Sheet: Sheet1
Supplementary Data 6:Gene annotation IDs and predicted gene length information of the 73 WRKY genes identified in Lycium ruthenicum.
Gene Name	Annotation ID	Predicted gene length (aa)	Gene Name	Annotation ID	Predicted gene length (aa)
>LrWRKY1	>CL10207Contig1	929	>LrWRKY38	>CL38113Contig1	726
>LrWRKY2	>CL10516Contig1	1236	>LrWRKY39	>CL3872Contig1	1833
>LrWRKY3	>CL1222Contig1	5207	>LrWRKY40	>CL5333Contig1	4283
>LrWRKY4	>CL13110Contig1	952	>LrWRKY41	>CL5501Contig1	1438
>LrWRKY5	>CL13243Contig1	2243	>LrWRKY42	>CL632Contig2	1556
>LrWRKY6	>CL13435Contig1	824	>LrWRKY43	>comp97224_c2_seq4_2	1211
>LrWRKY7	>CL22322Contig1	2231	>LrWRKY44	>CL12253Contig1	1092
>LrWRKY8	>CL24264Contig1	957	>LrWRKY45	>CL10505Contig1	954
>LrWRKY9	>CL24521Contig1	1213	>LrWRKY46	>CL12681Contig1	533
>LrWRKY10	>CL25301Contig1	1644	>LrWRKY47	>CL14262Contig1	503
>LrWRKY11	>CL26098Contig1	972	>LrWRKY48	>CL15273Contig1	3073
>LrWRKY12	>CL26783Contig1	840	>LrWRKY49	>CL15312Contig1	837
>LrWRKY13	>CL2685Contig1	1142	>LrWRKY50	>CL15931Contig1	637
>LrWRKY14	>CL27139Contig1	1844	>LrWRKY51	>CL16027Contig1	348
>LrWRKY15	>CL27578Contig1	689	>LrWRKY52	>CL17274Contig1	881
>LrWRKY16	>CL27847Contig1	2061	>LrWRKY53	>CL18266Contig1	1838
>LrWRKY17	>CL28421Contig1	1354	>LrWRKY54	>CL20703Contig1	723
>LrWRKY18	>CL29336Contig1	1107	>LrWRKY55	>CL21889Contig1	1286
>LrWRKY19	>CL29649Contig1	1498	>LrWRKY56	>CL23106Contig1	613
>LrWRKY20	>CL29863Contig1	1550	>LrWRKY57	>CL26226Contig1	905
>LrWRKY21	>CL30235Contig1	1409	>LrWRKY58	>CL27043Contig1	962
>LrWRKY22	>CL31050Contig1	1701	>LrWRKY59	>CL35591Contig1	593
>LrWRKY23	>CL32029Contig1	1209	>LrWRKY60	>CL3590Contig1	1968
>LrWRKY24	>CL32049Contig1	1655	>LrWRKY61	>CL37579Contig1	656
>LrWRKY25	>CL32141Contig1	1138	>LrWRKY62	>CL37957Contig1	943
>LrWRKY26	>CL32381Contig1	1334	>LrWRKY63	>CL38724Contig1	576
>LrWRKY27	>CL32412Contig1	1245	>LrWRKY64	>CL39377Contig1	619
>LrWRKY28	>CL32469Contig1	1684	>LrWRKY65	>CL39672Contig1	641
>LrWRKY29	>CL32525Contig1	1193	>LrWRKY66	>CL39675Contig1	650
>LrWRKY30	>CL32619Contig1	1153	>LrWRKY67	>CL4241Contig1	458
>LrWRKY31	>CL32863Contig1	1620	>LrWRKY68	>CL6036Contig1	777
>LrWRKY32	>CL34047Contig1	785	>LrWRKY69	>CL632Contig1	2762
>LrWRKY33	>CL34086Contig1	810	>LrWRKY70	>CL646Contig1	1744
>LrWRKY34	>CL3516Contig1	1620	>LrWRKY71	>CL8426Contig1	679
>LrWRKY35	>CL36547Contig1	510	>LrWRKY72	>CL28659Contig1	1539
>LrWRKY36	>CL37293Contig1	797	>LrWRKY73	>CL8621Contig1	2484
>LrWRKY37	>CL37659Contig1	798
